# Supplementary material
Source: PubMed Central journal article supplement (PMC4586339)
Supplement: ACI-06-0506-s001.pdf [file ACI-06-0506-s001.pdf]

Attributes prior to age 2 used to train the models:

| <b>ATTRIBUTE</b>            | <b>DESCRIPTION</b>                                                                  |
|-----------------------------|-------------------------------------------------------------------------------------|
| Abdomen_Exam                | Physical exam of abdomen performed                                                  |
| Abuse_Concern               | Tracks screening and evaluation for possible abuse                                  |
| any_household_members_smoke | Any household members smoke in the house                                            |
| arms_length_around_water    | Adults are at arms length when child around water                                   |
| baby_left_alone_could_fall  | Baby is left alone on a high surface where it could roll off and fall.              |
| Back_Exam                   | Physical exam of abdomen performed                                                  |
| back_seat_of_bicycle        | Child ever rides on the back seat of an adult bicycle                               |
| breast_feeding_help_needed  | Help required for breast_feeding                                                    |
| BREASTFED                   | Whether mother is breastfeeding                                                     |
| burns_knowledge             | Whether a parent knows what to do if their child is burned                          |
| Car_Seat_Inspection         | Asks whether parent has obtained a car seat inspection                              |
| Car_Seat_Position_0-1       | Whether caregiver understands correct car seat position                             |
| carries_hot_liquids         | Whether a child is carried by caregiver with hot liquids                            |
| Chest/Lungs_Exam            | Physical exam of chest and lungs performed                                          |
| Cholesterol_Screen          | Tracks cholesterol screening for pediatrics                                         |
| Corrected_Vision            | Whether vision was corrected by contacts or glasses when tested                     |
| Counseling                  | Patient education                                                                   |
| counseling_topic            | Patient education topic                                                             |
| cutting_food_bite_size      | Whether a child's food is cut into small, thin pieces                               |
| Dental_Advice               | Dental care advice provided by pediatrician                                         |
| Developmental_Referral      | Documents the status of a developmental referral                                    |
| Domest_Violence_Concern     | Tracks domestic violence screening and management                                   |
| doors_secure                | Whether doors in the house are secure against a child opening them                  |
| EarlyCowMilkIntro           | Assesses early cow milk iron deficiency anemia risk factor                          |
| Ears/Hearing_Exam           | Physical exam of ears and hearing performed                                         |
| empty_container_after_use   | Parents empty baths and containers after use                                        |
| ENVIRONMENTAL HISTORY       | Information relating to the environment and exposures that influence a child's life |
| ExtGenitalia_Exam           | Physical exam of external genitalia performed                                       |
| Extremities_Exam            | Physical exam of extremities performed                                              |
| Eyes/Vision_Exam            | Physical exam of eyes and vision performed                                          |
| family_substance_abuse      | GAPS variable holds if patient's family members abuse alcohol or drugs              |
| Feed_at_Night               | Baby feeds at night                                                                 |
| fhx_deafness                | Records a family history of deafness                                                |
| firearms_at_home            | Firearms are in the child's home                                                    |
| firearms_kept_unloaded      | Firearms at home are stored safely                                                  |
| firearms_where_visits       | Parent knows if guns are in homes where their child visits                          |
| FLU INJECT CHICA            | Influenza vaccine given                                                             |
| Fluoride_supplemented       | Whether a child is receiving fluoride supplementation                               |
| gender                      | Child's gender                                                                      |
| General_Exam                | General physical exam performed                                                     |
| has_smoke_detector          | Family has smoke detector                                                           |
| has_stairway_gates          | Whether there are gates on stairs                                                   |
| has_window_guards           | Whether the house has window guards installed.                                      |

|                                      |                                                                                                                                    |
|--------------------------------------|------------------------------------------------------------------------------------------------------------------------------------|
| Head_Exam                            | Physical exam of head performed                                                                                                    |
| Hearing Left                         | Left side hearing assessment from PSF                                                                                              |
| Hearing Right                        | Right side hearing assessment from PSF                                                                                             |
| HearL1000                            | Left ear at 1000db                                                                                                                 |
| HearL2500                            | Left ear at 2500db                                                                                                                 |
| HearL500                             | Left ear at 500db                                                                                                                  |
| HearL5000                            | Left ear at 5000db                                                                                                                 |
| HearR1000                            | Right ear at 1000db                                                                                                                |
| HearR2500                            | Right ear at 2500db                                                                                                                |
| HearR500                             | Right ear at 500db                                                                                                                 |
| HearR5000                            | Right ear at 5000db                                                                                                                |
| Heart/Pulses_Exam                    | Physical exam of heart and pulses performed                                                                                        |
| HiPbSibFriend                        | Child has a friend or sibling with hi lead levels                                                                                  |
| hot_water_heater_adjusted            | Whether heater is adjusted appropriately                                                                                           |
| HouseBltPre1950                      | Child lives in a house built before 1950                                                                                           |
| household_products_out_of_reach      | Household chemicals out of child's reach                                                                                           |
| Immune_Compromise                    | Child's immune system is compromised                                                                                               |
| Insurance                            | Type of insurance covering child                                                                                                   |
| IRON DEFICIENCY SCREEN - QUALITATIVE | Assessment of child's iron deficiency status, collected through questioning of family, child.                                      |
| IronDeficiencyRisk                   | Risk for iron deficiency and subsequent anemia                                                                                     |
| JIT hand out given                   | Just In Time patient handout given to family                                                                                       |
| know_how_to_save_choking_child       | Whether parent knows how to save choking child                                                                                     |
| left_alone_in_water                  | Child has ever been left alone in or near water                                                                                    |
| low_iron_formula                     | Whether child has been consistently fed a non-iron fortified formula                                                               |
| LowBirthWeight                       | <2500 gms birthweight                                                                                                              |
| LowLiteracyRisk                      | Parent has low literacy                                                                                                            |
| lye_drain_cleaners_in_house          | Whether lye drain cleaner is in the home                                                                                           |
| matches_lighters_safe                | Matches and lighters kept out of reach                                                                                             |
| Maternal_Depression_Concern          | Parental depression status, including parent reported symptoms of depression from the PHQ-2 ultra-brief depression screener [2     |
| Medical_Developmental_Eval           | Keeps track of ASQ medical developmental evaluation                                                                                |
| MEDICATION ALLERGIES                 | Allergies to medication                                                                                                            |
| MEDICATION ALLERGIES CAREWEB         | Allergies to medication sent to EMR                                                                                                |
| NBS_Repeated                         | Newborn Screening report required                                                                                                  |
| NEGATIVE ENVIRONMENTAL HISTORY       | A medical record of pertinent negatives about a child's environment.                                                               |
| NEGATIVE NUTRITION HISTORY           | Risk factors related to a child's nutrition status that weren't present upon direct questioning of family or the child themselves. |
| NEGATIVE PAST MEDICAL HISTORY        | General risk factors and findings related to a patient's medical status found not to be present.                                   |
| Neuro_Exam                           | Physical neurologic exam performed                                                                                                 |
| NoBP                                 | Child did not cooperate for blood pressure screening                                                                               |
| Nodes_Exam                           | Physical exam of nodes performed                                                                                                   |
| NoHearing                            | Child did not cooperate for hearing screening                                                                                      |
| normal_newborn_screen                | Normal newborn screening recorded                                                                                                  |
| Nose/Throat_Exam                     | Physical exam of nose and throat performed                                                                                         |
| NoVision                             | Child did not cooperate for vision screening                                                                                       |
| NUTRITION HISTORY                    | Risk factors related to nutrition problems, such as iron deficiency anemia.                                                        |

|                                     |                                                                                                      |
|-------------------------------------|------------------------------------------------------------------------------------------------------|
| OBESE_BEFORE_12mo                   | Weight percentile >= 95 before 12 months old                                                         |
| OBESE_BEFORE_18mo                   | Weight percentile >= 95 before 18 months old                                                         |
| OBESE_BEFORE_24mo                   | Weight percentile >= 95 before 24 months old                                                         |
| OBESE_BEFORE_2mo                    | Weight percentile >= 95 before 2 months old                                                          |
| OBESE_BEFORE_6mo                    | Weight percentile >= 95 before 6 months old                                                          |
| Oral_Exam                           | Physical oral exam performed                                                                         |
| OVERWEIGHT_BEFORE_12mo              | Weight percentile >= 85 before 12 months old                                                         |
| OVERWEIGHT_BEFORE_18mo              | Weight percentile >= 85 before 18 months old                                                         |
| OVERWEIGHT_BEFORE_24mo              | Weight percentile >= 85 before 24 months old                                                         |
| OVERWEIGHT_BEFORE_2mo               | Weight percentile >= 85 before 2 months old                                                          |
| OVERWEIGHT_BEFORE_6mo               | Weight percentile >= 85 before 6 months old                                                          |
| PAIN QUALITATIVE                    | Response to a screening question which assesses any presence of pain for a given patient.            |
| PAIN QUALITATIVE CAREWEB            | Response to a screening question which assesses any presence of pain for a given patient sent to EMR |
| PAIN QUANTITATIVE                   | Physician-scored assessment of pain level                                                            |
| Parents_Confident_Filling_Out_Forms | Parent is confident filling out medical forms                                                        |
| Parents_Need_Help_Reading           | Parent needs help reading forms                                                                      |
| PAST MEDICAL HISTORY CHICA          | General risk factors and findings related to a patient's medical status.                             |
| Patient_Education                   | Type of patient education given                                                                      |
| PatientHandout                      | Patient education handout given                                                                      |
| plastic_wrappers_secured            | Whether plastic wrappers are secured and out of reach                                                |
| play_area_cooking                   | Whether the child has a safe play area for when an adult is cooking                                  |
| play_area_fenced                    | Whether a child's play area is fenced.                                                               |
| play_equipment_protected            | Whether play equipment has proper protection underneath.                                             |
| plays_dangerous_items               | Child plays with dangerous items.                                                                    |
| poison_center_on_phone              | Whether the Poison center number is on the phone                                                     |
| pool_at_house                       | Pool at the house                                                                                    |
| PPD - QUALITATIVE                   | A qualitative PPD test result collected through questioning, direct observation.                     |
| PPD_Result                          | PPD results                                                                                          |
| preferred_language                  | Family's preferred language determined by language used to answer prescreener form                   |
| premature                           | Child is born premature.                                                                             |
| prescribed_birth_control            | Provider prescribed birth control.                                                                   |
| prescription_for_cessation          | Prescription for nicotine replacement given                                                          |
| PSFSickleCell                       | Parents identify their child as having sickle cell disease                                           |
| PWS READ ERROR                      | Error when reading physician worksheet                                                               |
| PWSSickleCell                       | Physician verified diagnosis of sickle cell disease.                                                 |
| Qualitative_Blood_Lead              | A semi-quantitative description of the blood lead level                                              |
| race                                | Patient race status                                                                                  |
| referral                            | Referral for services given by clinician                                                             |
| RenovatedPre78                      | Child lives in a house built before 1978, which is undergoing renovation                             |
| risk_based_hearing_screen           | Child is sent for a risk-based hearing screen.                                                       |
| ROR_Books_Given                     | Reach out and read books given                                                                       |
| safety_caps_on_bottles              | Whether safety caps are on appropriate bottles                                                       |
| safety_latches_installed            | Whether safety latches are installed on cabinets and drawers                                         |
| seen_dentist                        | Child has seen a dentist recently                                                                    |

|                                 |                                                                                    |
|---------------------------------|------------------------------------------------------------------------------------|
| sharp_edged_furniture           | Whether the house has sharp-edged furniture.                                       |
| sickle_cell_prophylaxis         | Child receiving antibiotic prophylaxis for Sickle cell disease.                    |
| Skin_Exam                       | Physical exam of skin performed                                                    |
| sleeps_on_side_or_back          | Child is placed in correct sleep position                                          |
| sleeps_unsafe_soft_surface      | Child sleeps on beanbag, waterbed, or other soft surface                           |
| slept_on_stomach_ever           | Whether baby has ever slept on stomach                                             |
| smoking_study_arm               | Smoking Cessation Study arm                                                        |
| taking_medications              | Child is currently taking medications                                              |
| taking_solid_food               | Whether a child is being fed solid foods                                           |
| TALL_BEFORE_12mo                | Height percentile $\geq$ 85 before 12 months old                                   |
| TALL_BEFORE_18mo                | Height percentile $\geq$ 85 before 18 months old                                   |
| TALL_BEFORE_24mo                | Height percentile $\geq$ 85 before 24 months old                                   |
| TALL_BEFORE_2mo                 | Height percentile $\geq$ 85 before 2 months old                                    |
| TALL_BEFORE_6mo                 | Height percentile $\geq$ 85 before 6 months old                                    |
| TB_Risk                         | Child's risk factors for tuberculosis exposure                                     |
| Teeth/Gums_Exam                 | Physical exam of teeth and gums performed                                          |
| Ten_Childrens_Books_In_Home     | Child has at least 10 children's books                                             |
| tested_smoke_detector           | Family checks detector monthly                                                     |
| Tooth_erupted                   | Child has a tooth                                                                  |
| TV_advice                       | Clinician advice about limiting TV                                                 |
| TV_in_Room                      | Child has a TV in their room                                                       |
| TV_over_2Hrs                    | Child watches more than 2 hrs of TV per day                                        |
| Uses_Bottle                     | Child uses a bottle                                                                |
| uses_walker                     | Whether child uses a walker or not                                                 |
| VENOUS BLOOD LEAD - QUALITATIVE | Lead test ordered by physician to measure serum lead level.                        |
| VERY_TALL_BEFORE_12mo           | Height percentile $\geq$ 95 before 12 months old                                   |
| VERY_TALL_BEFORE_18mo           | Height percentile $\geq$ 95 before 18 months old                                   |
| VERY_TALL_BEFORE_24mo           | Height percentile $\geq$ 95 before 24 months old                                   |
| VERY_TALL_BEFORE_2mo            | Height percentile $\geq$ 95 before 2 months old                                    |
| VERY_TALL_BEFORE_6mo            | Height percentile $\geq$ 95 before 6 months old                                    |
| VisionScreen                    | Tracks children's progress through vision screen testing and subsequent referrals. |
| VisitType                       | The type of clinical visit for a patient (well, sick, etc.).                       |
| Watches_TV                      | Child watches TV                                                                   |
| wears_bike_helmet               | Whether child wears bike helmet                                                    |
| well_water                      | Describes whether a child receives their water from a well.                        |
| WICMember                       | Identifies that the child is currently a member of the WIC program.                |
